# Supplementary material
Source: Springer Nature journal article supplement (https://www.springermedizin.de/resource/supplementary/12916_2009_263_MOESM1_ESM.pdf/9599582)
Supplement: MOESM1 [file 9599582]

All VA patients  $\geq 66$  years old with at least 1 AED during FY04-FY07

N = 449,269

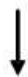

with new AED prescriptions

N = 114,333

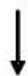

AED monotherapy only [defined cohort]

N = 112,096

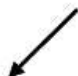

New onset  
Epilepsy

N = 7,445

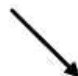

No Epilepsy

N = 104,651

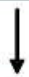

Suicidality  
cases\*

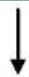

Suicidality  
cases\*

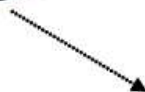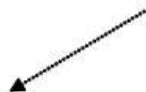

for the multivariable models, a matching schema of 1:12 for the 64 suicidality cases to controls yielded a total N = 832 [matched according to study protocol in methods section]

\*Due to privacy policies, the numbers for suicidality cases are too small to report.
